# Supplementary material for: Adipose Stem Cells Display Higher Regenerative Capacities and More Adaptable Electro-Kinetic Properties Compared to Bone Marrow-Derived Mesenchymal Stromal Cells
Source: PubMed Central journal article supplement (PMC5121630; doi:10.1038/srep37801), 2016-11-24
Supplement: srep37801-s1.pdf [file srep37801-s1.pdf]

# **Adipose Stem Cells Display Higher Regenerative Capacities and More Adaptable Electro-Kinetic Properties Compared to Bone Marrow-Derived Mesenchymal Stromal Cells**

Ahmed El-Badawy<sup>1</sup>, Marwa Amer<sup>1</sup>, Reda Abdelbaset<sup>2,3</sup>, Sameh Elmasry<sup>2,3</sup>, Marwan Abo-Elela<sup>2</sup>, Yehya H. Ghallab<sup>2,3</sup>, Hamdy Abdelhamid<sup>2</sup>, Yehea Ismail<sup>2</sup> and Nagwa El-Badri<sup>1\*</sup>

1. Center of Excellence for Stem Cells and Regenerative Medicine (CESC), Zewail City of Science and Technology, Egypt
2. Center of Nanoelectronics and Devices (CND), Zewail City of Science and Technology/ American University in Cairo, Cairo, Egypt
3. Department of Biomedical Engineering, Helwan University, Cairo, Egypt

**\* Correspondence:** Prof. Nagwa El-Badri, M.D., Ph.D.

Director, Center of Excellence for Stem cells and Regenerative Medicine (CESC), Zewail City of Science and Technology, Sheikh Zayed District, 12588, 6th of October City, Giza, Egypt, Tel: +2 02 385 40 401, Email: [nelbadri@zewailcity.edu.eg](mailto:nelbadri@zewailcity.edu.eg)

BM-MSCs

ASCs

Supplementary Figure 1

A

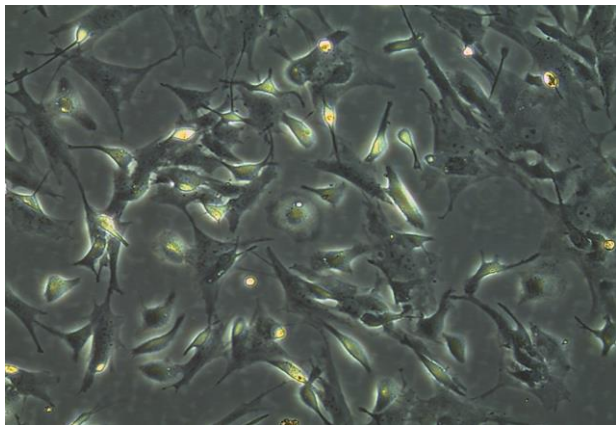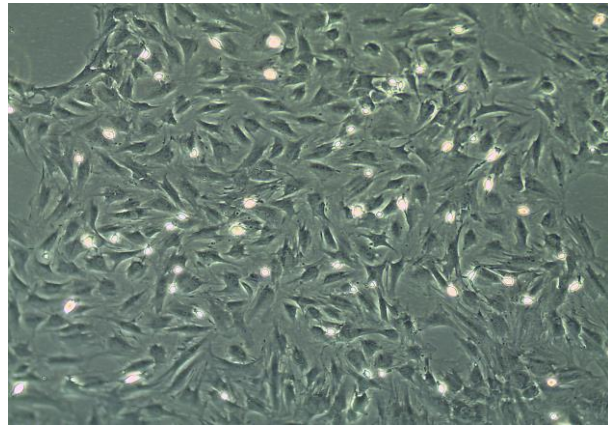

B

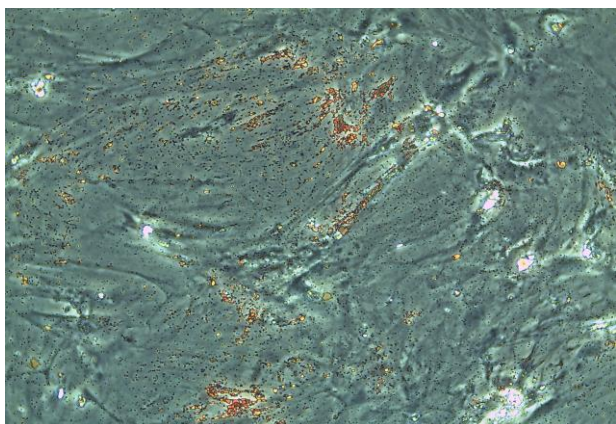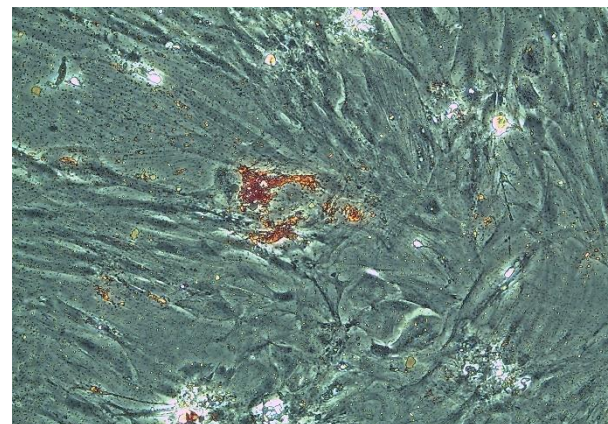

C

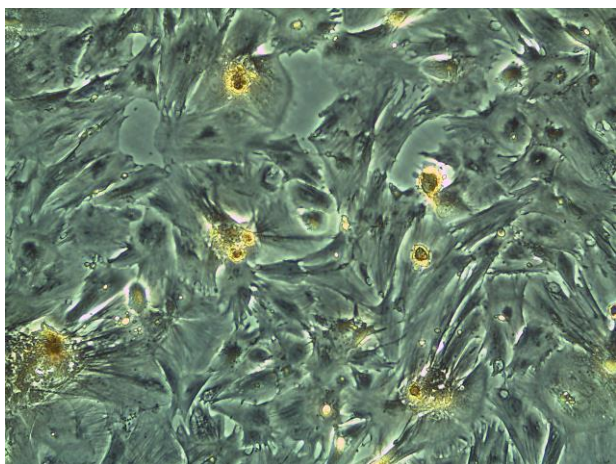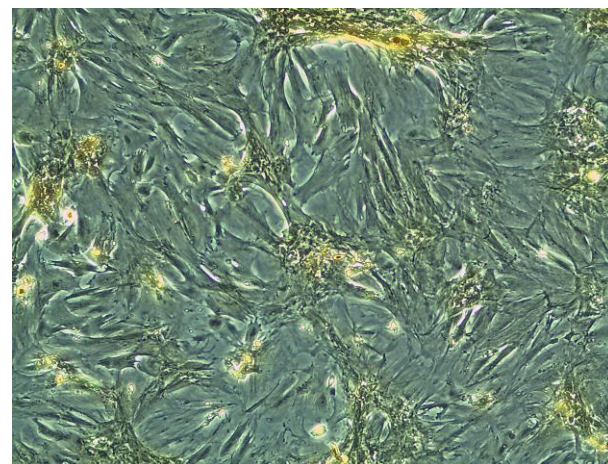

D

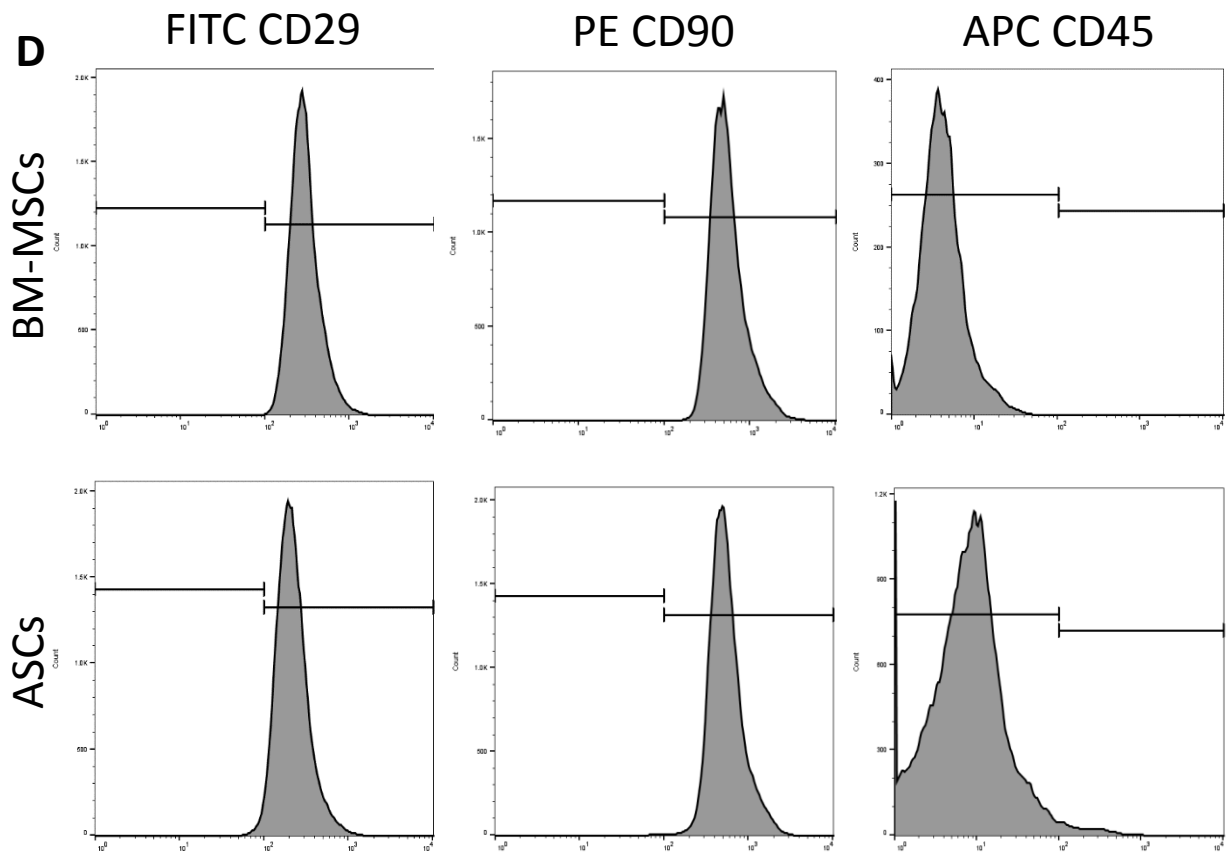

# CD31

Sham

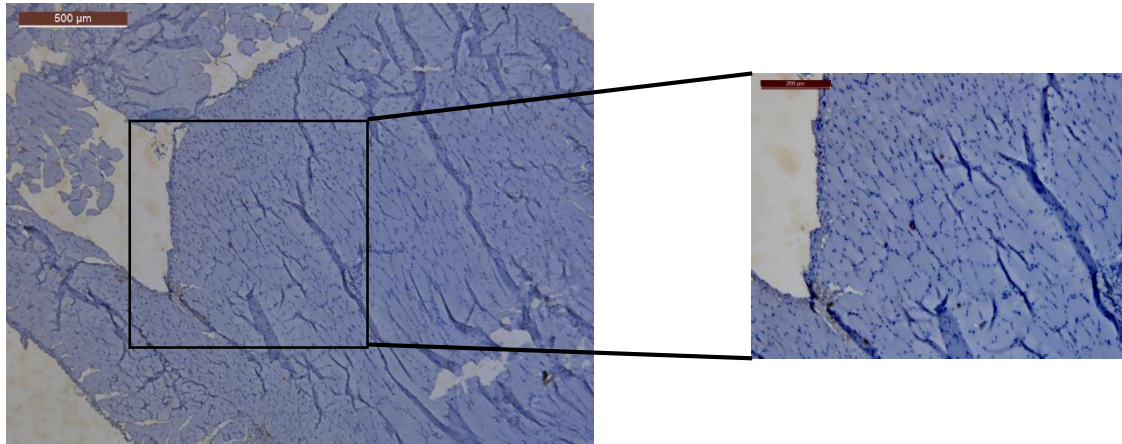

Control

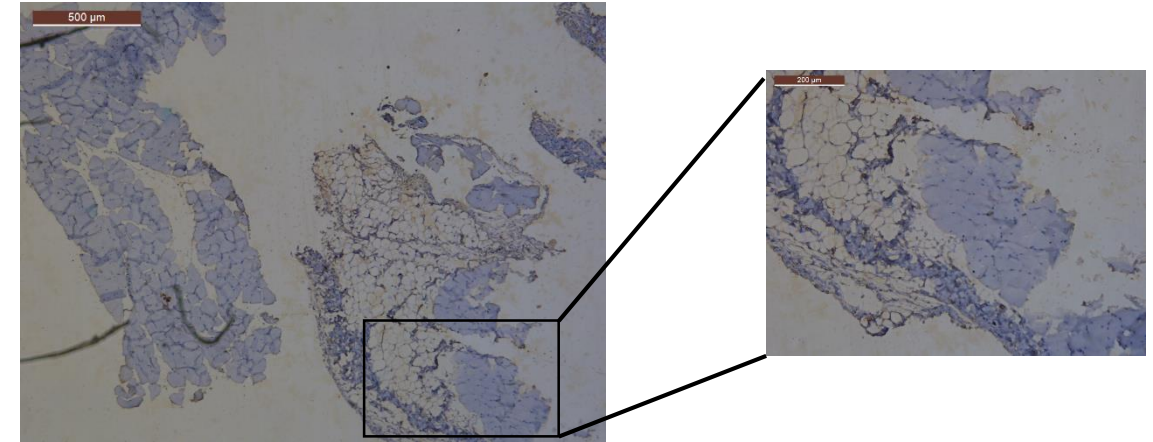

BM-MSCs

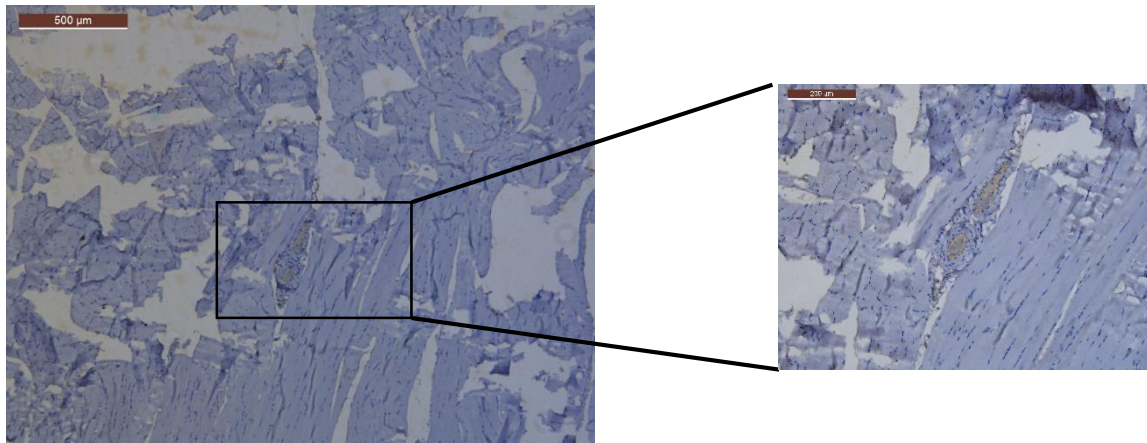

ASCs

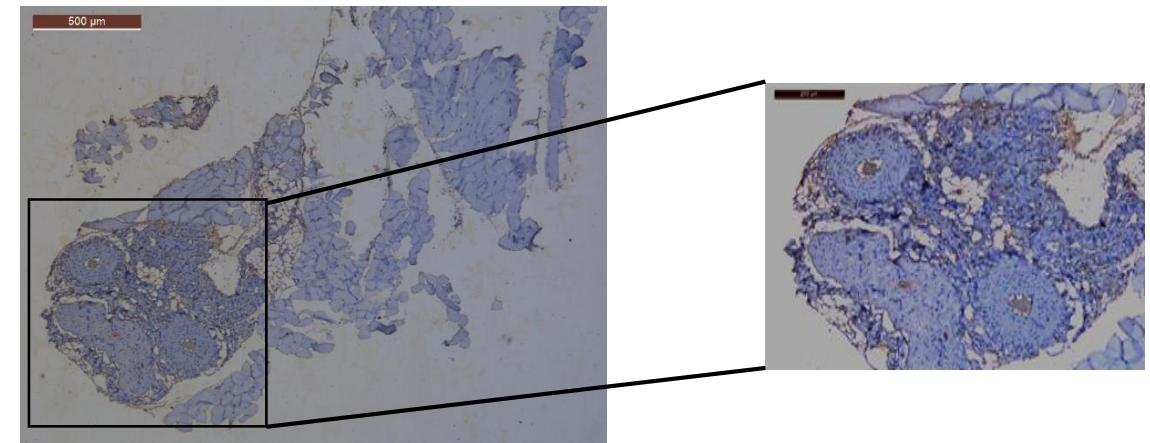

# CD34

Sham

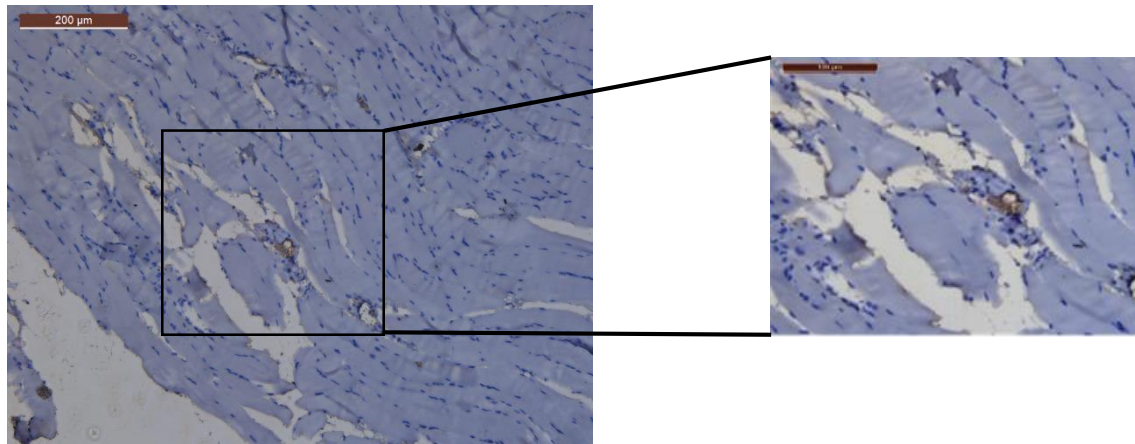

Control

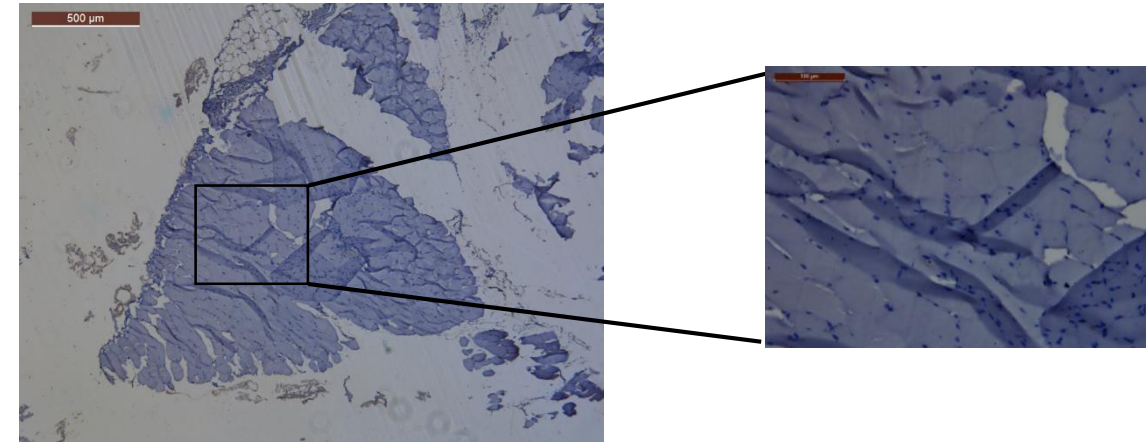

BM-MSCs

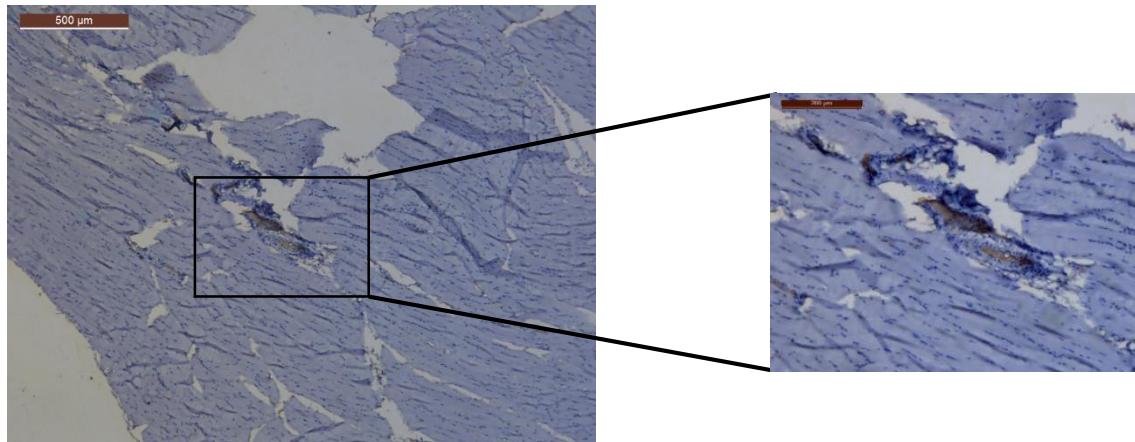

ASCs

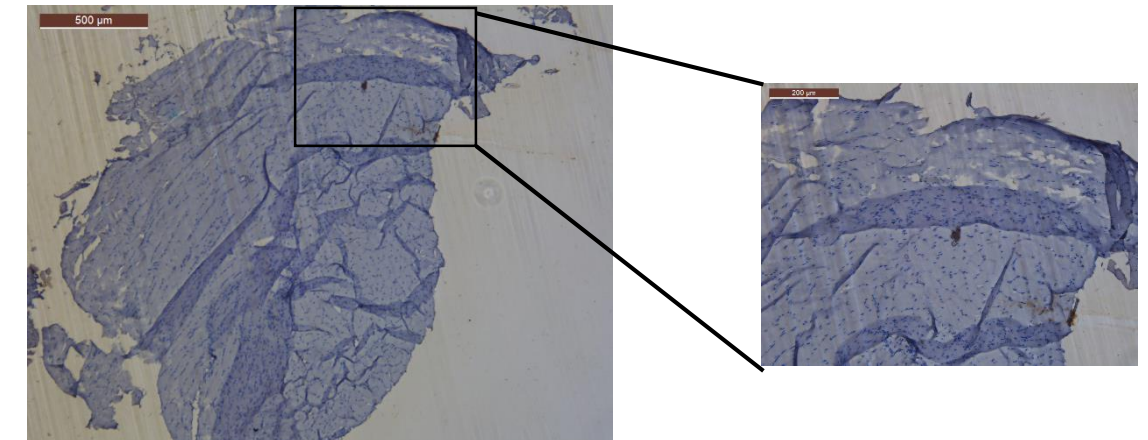

# VEGF

Sham

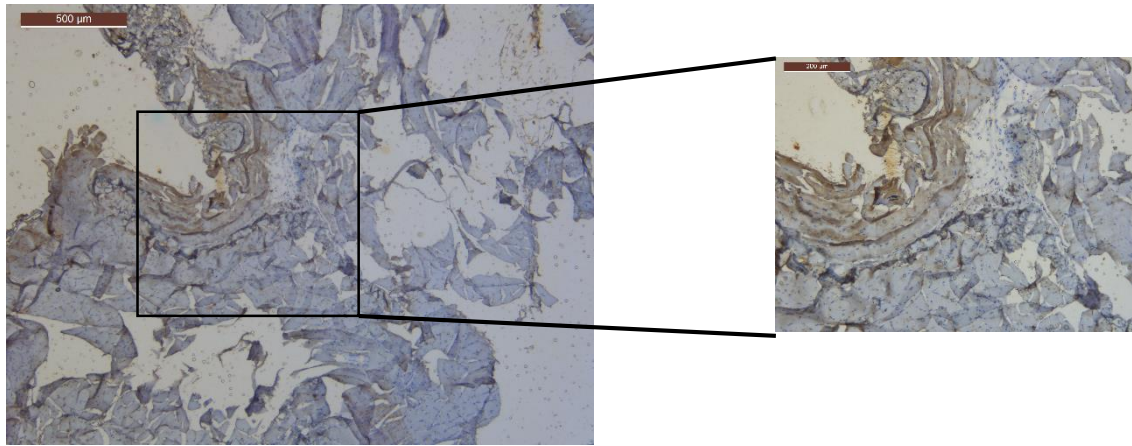

Control

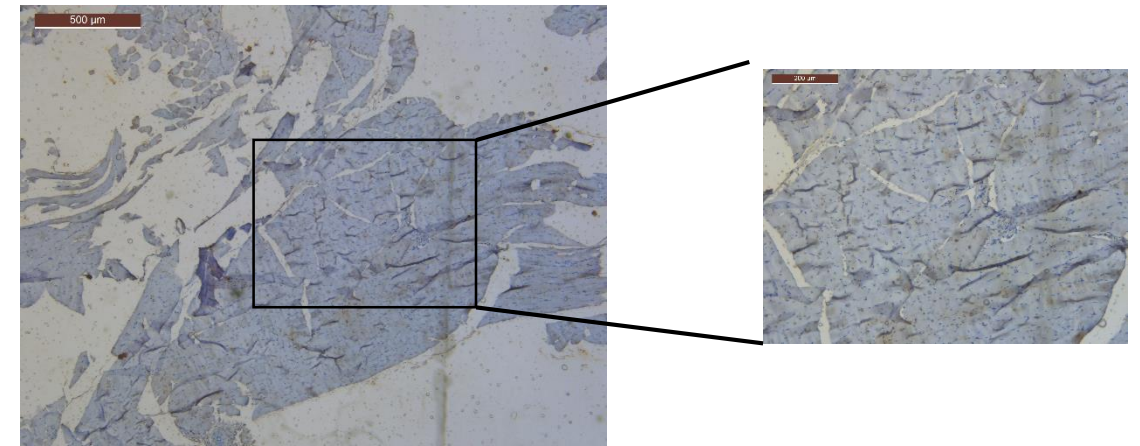

BM-MSCs

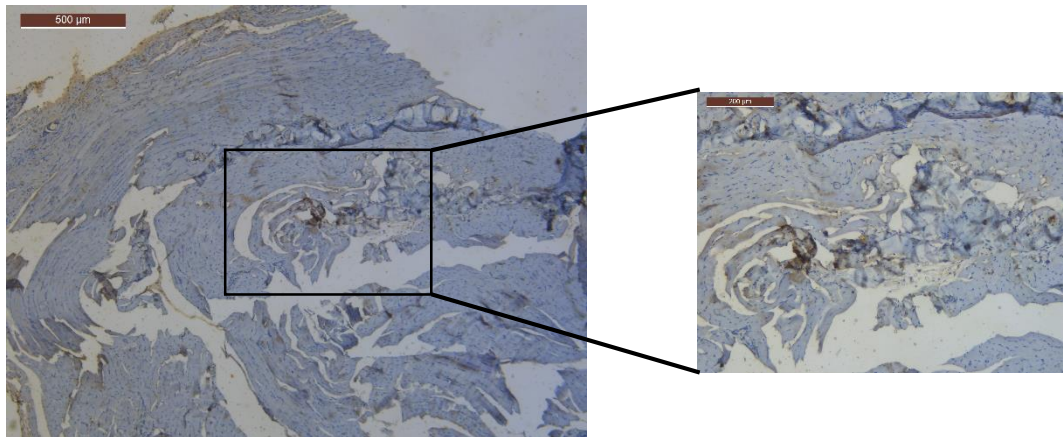

ASCs

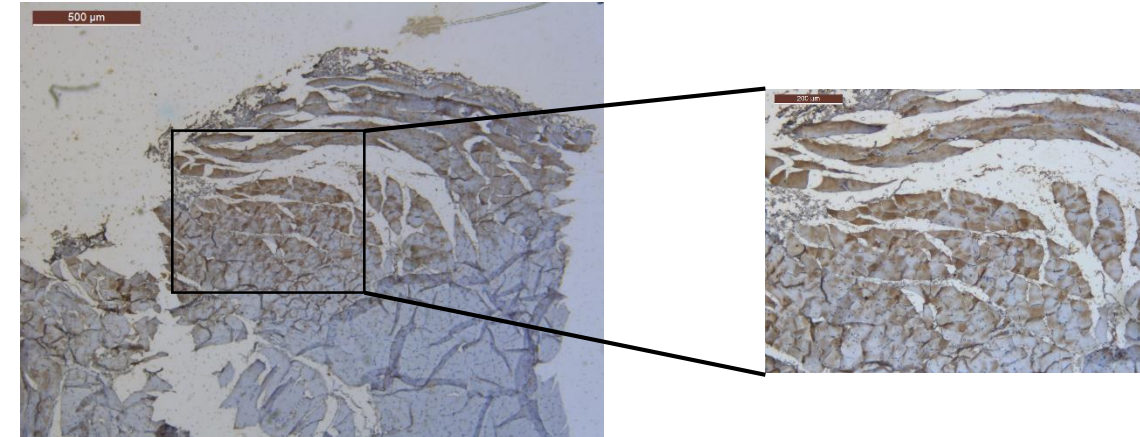

# $\alpha$ SMA

Sham

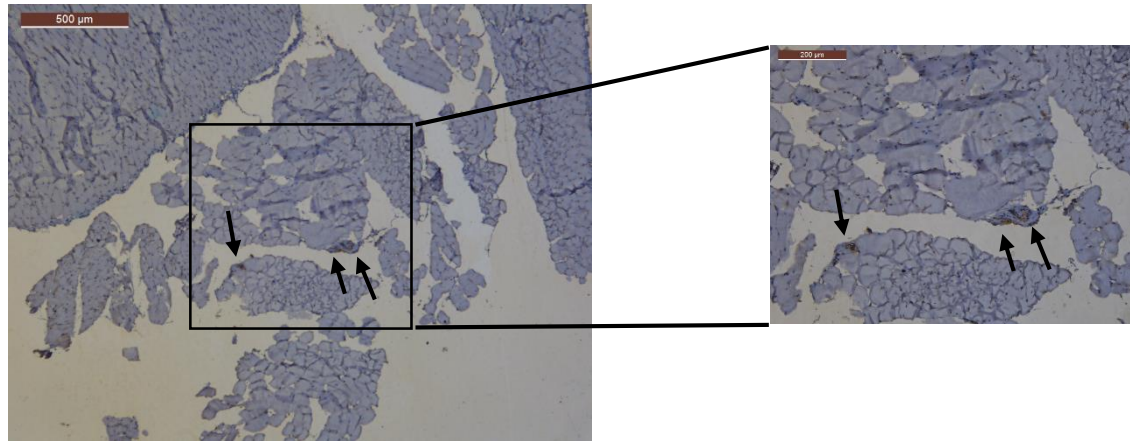

Control

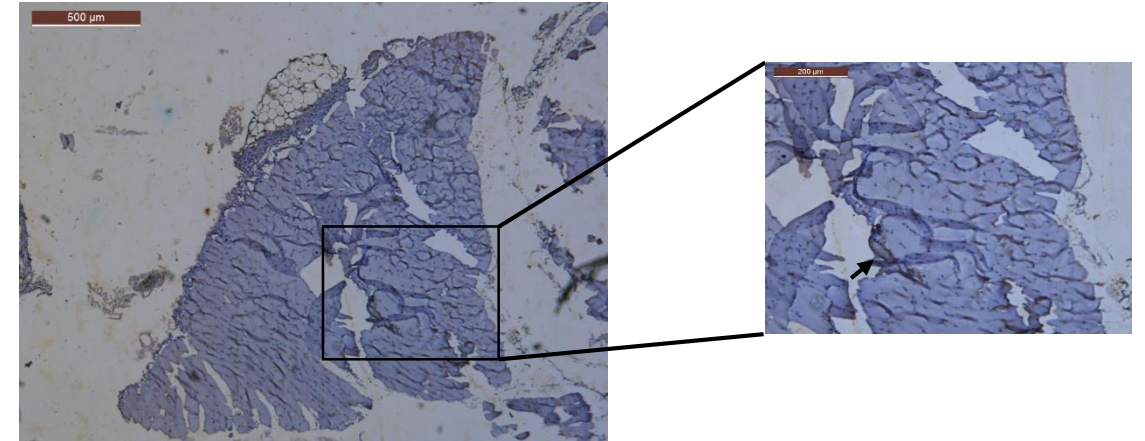

BM-MSCs

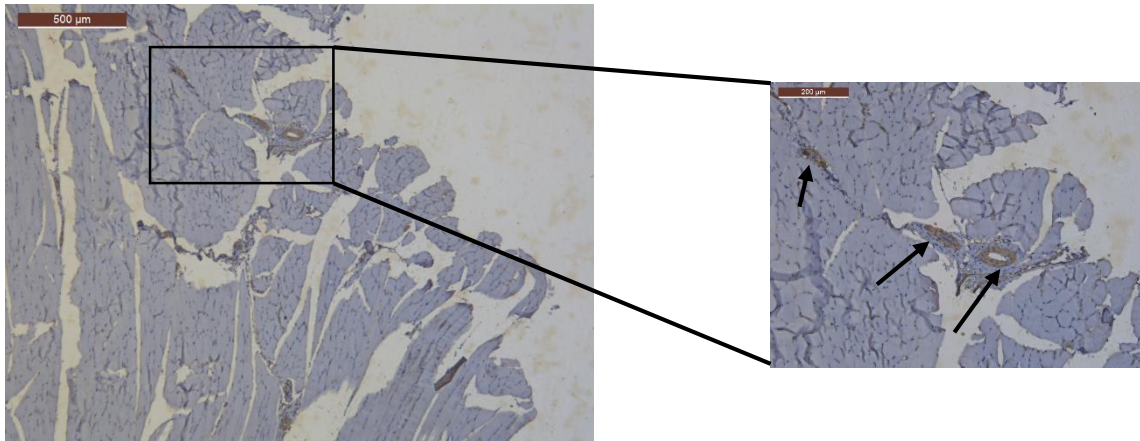

ASCs

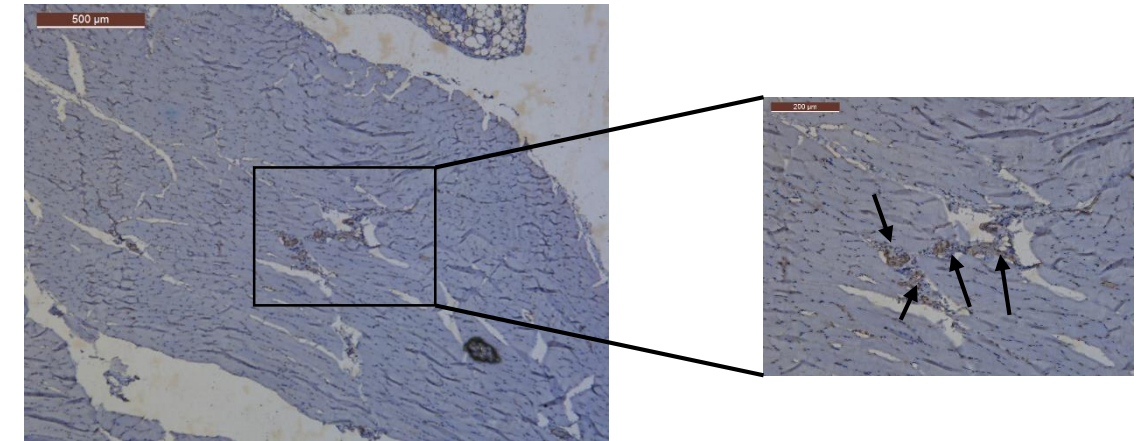

# MMP9

Sham

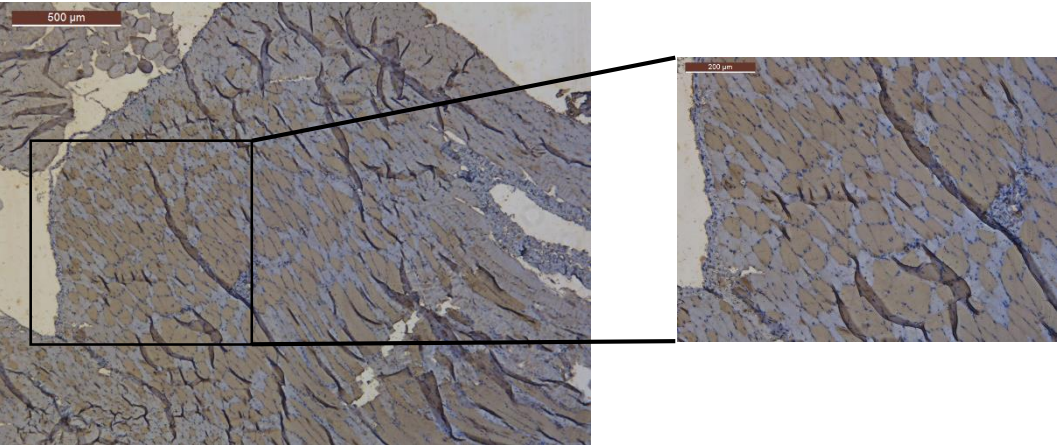

Control

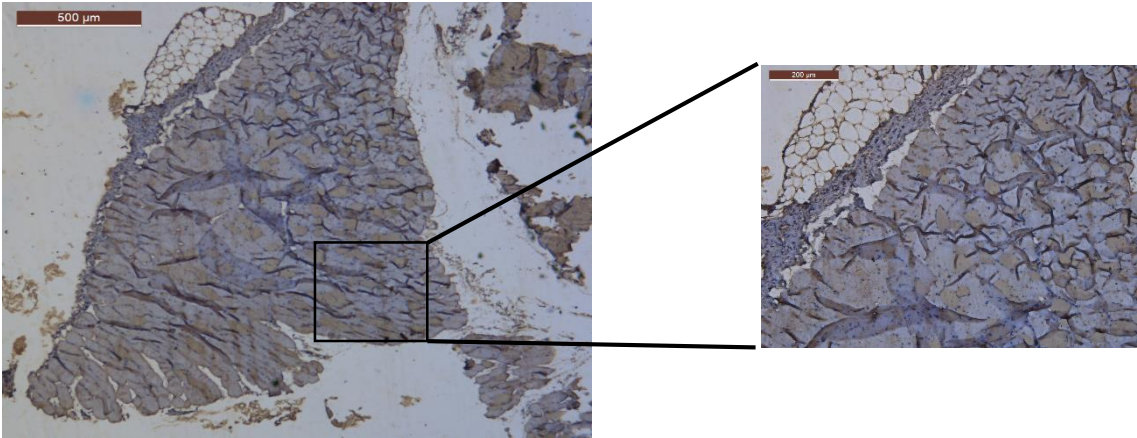

BM-MSCs

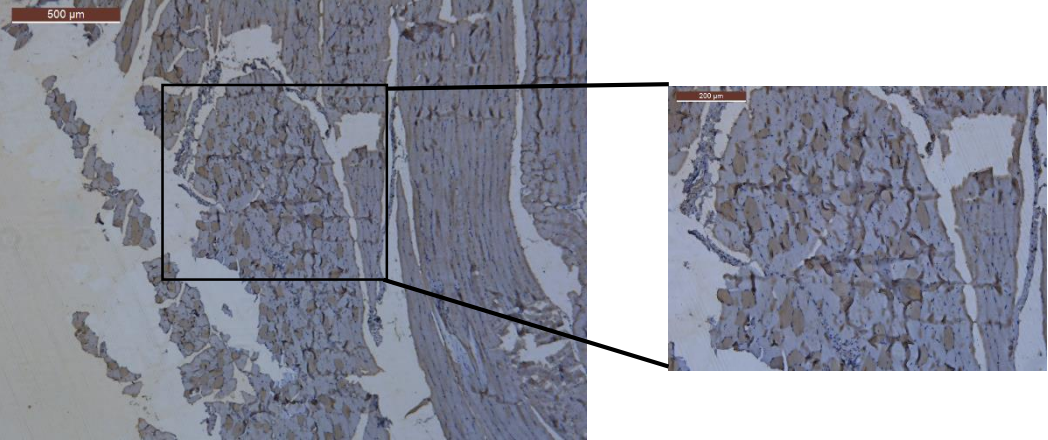

ASCs

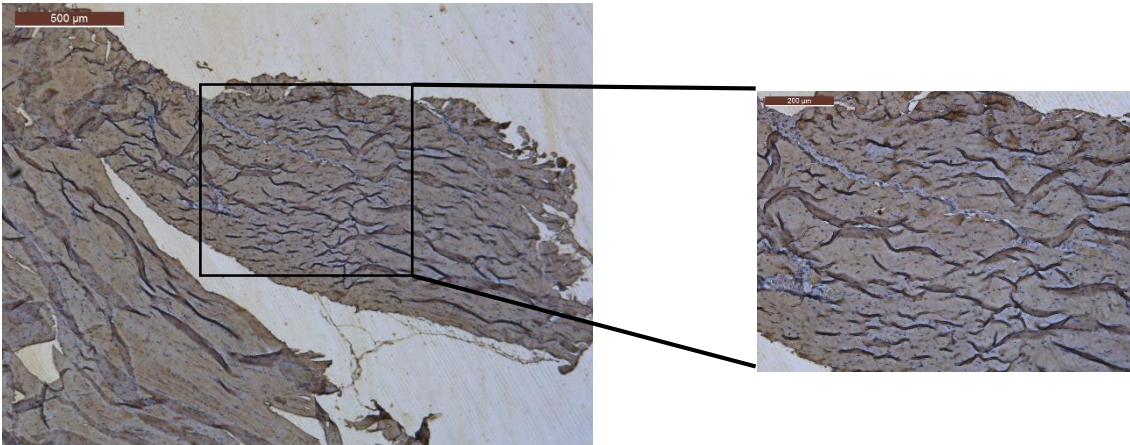

A

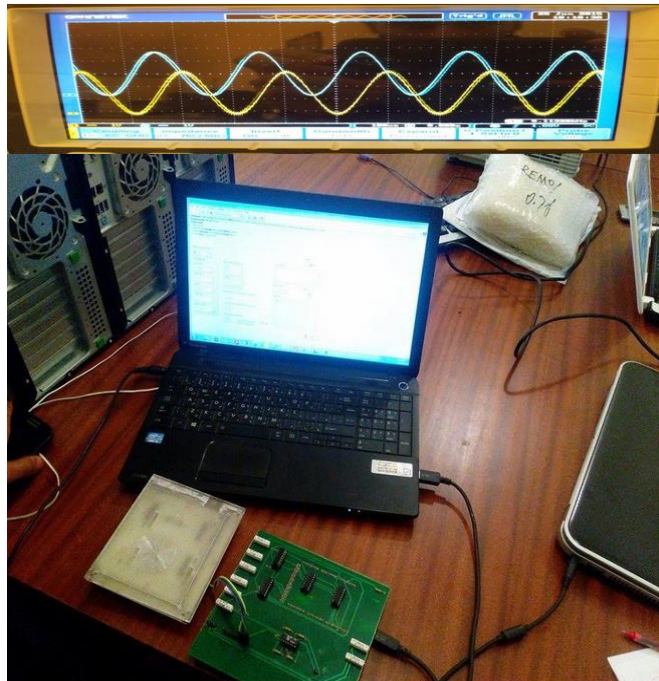

B

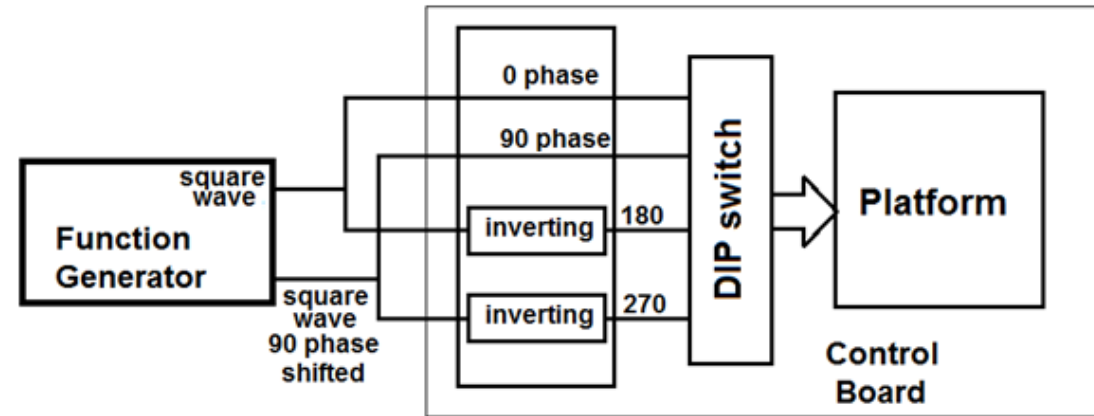

C

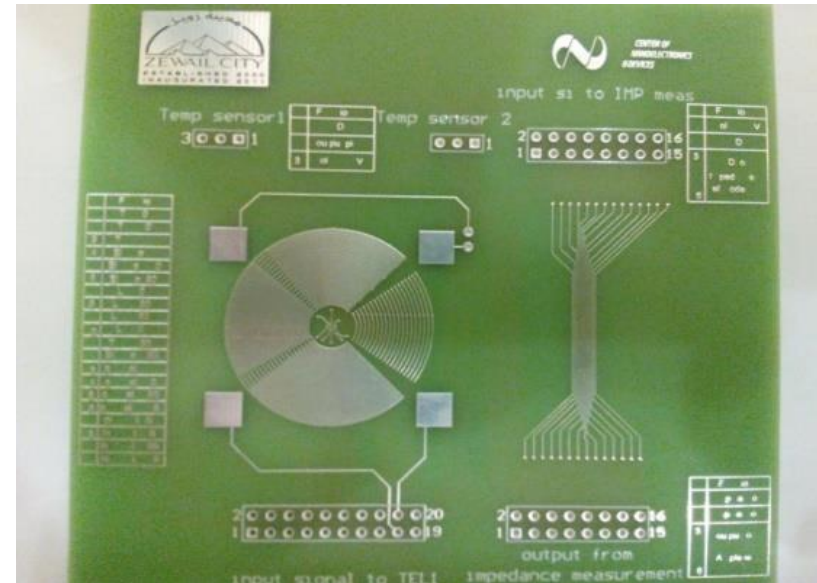



### Supplementary Figures Legend:

**Figure 1:** Phase contrast images of BM-MSCs and ASCs showing elongated spindle-shaped cells morphology (A). Phase contrast images of BM-MSCs and ASCs differentiated into adipocytes as indicated by oil red O staining (B) and into osteocytes as indicated by alizarin red staining (C). (D) Flow cytometry characterization of BM-MSCs and ASCs showing a weak expression of the leukocyte marker, CD45, and positive expression of stem cell-specific markers, CD29 and CD90. Scale bar, 100  $\mu\text{m}$ . Magnification 10x

**Figure 2:** Representative histological analysis of original and magnified images of hind limb muscles stained for CD31

**Figure 3:** Representative histological analysis of original and magnified images of hind limb muscles stained for CD34

**Figure 4:** Representative histological analysis of original and magnified images of hind limb muscles stained for VEGF

**Figure 5:** Representative histological analysis of original and magnified images of hind limb muscles stained for  $\alpha\text{SMA}$

**Figure 6:** Representative histological analysis of original and magnified images of hind limb muscles stained for MMP9

**Figure 7:** (A) Complete Microfluidic Platform which includes the PCB platform, microfluidic chamber and the laptop (B) Block diagram of the system setup which includes the switches and the generator interface (C) PCB platform used to extract electrokinetic properties of ASCs and BM-MSCs

**Tables:**

**Supplementary Table S1: Sequence of Primers used**

| <b>Gene name</b>    | <b>Primer Sequence</b>   |
|---------------------|--------------------------|
| Beta actin- Forward | ATCATGTTTGAGACCTTCAACACC |
| Beta actin- Reverse | TAGCTCTTCTCCAGGGAGG      |
| Oct4- Forward       | TCAGGTTGGACTGGGCCTAGT    |
| Oct4 -Reverse       | GGAGGTTCCCTCTGAGTTGCTT   |
| VEGF- Forward       | GCACTGGACCCTGGCTTTACT    |
| VEGF -Reverse       | ATGGGACTTCTGCTCTCCTTCTG  |
| TGF beta1- Forward  | ATACGCCTGAGTGGCTGTCT     |
| TGF beta1- Reverse  | TCTCTGTGGAGCTGAAGCAA     |
| FGF-2- Forward      | CTTGCTATGAAGGAAGATGGA    |
| FGF-2 Reverse       | TGCCCAGTTCGTTTCAGTG      |
| MMPII- Forward      | TTGCAGGAGACAAGTTCTGGAG   |
| MMPII- Reverse      | CGATGAGCTTAGGGAAAC       |

**Supplementary Videos Legend:**

**Online Supplementary Video 1:** Traveling wave velocity of ASCs and at 8 MHz

**Online Supplementary Video 2:** Traveling wave velocity of BM-MSCs and at 8 MHz
